# 1 Detection of *Campylobacter* in air 2 samples from poultry houses using 3 shot-gun metagenomics – a pilot 4 study

5 Thomas H.A. Haverkamp<sup>1\*</sup>, Bjørn Spilsberg<sup>1</sup>, Gro S.

6 Johannessen<sup>1</sup>, Mona Torp<sup>1</sup>, Camilla Sekse<sup>1</sup>

7 <sup>1</sup> Norwegian Veterinary institute, Oslo, Norway

8 \*Corresponding author: [thomas.haverkamp@vetinst.no](mailto:thomas.haverkamp@vetinst.no)

9 [bjorn.spilsberg@vetinst.no](mailto:bjorn.spilsberg@vetinst.no); [gro.johannessen@vetinst.no](mailto:gro.johannessen@vetinst.no); [mona.torp@yahoo.no](mailto:mona.torp@yahoo.no);

10 [camilla.sekse@vetinst.no](mailto:camilla.sekse@vetinst.no)

11

## 12 Abstract

### 13 Background:

14 Foodborne pathogens such as *Campylobacter jejuni* are responsible for a large fraction of the  
15 gastrointestinal infections worldwide associated with poultry meat. *Campylobacter spp.* can be found  
16 in the chicken fecal microbiome and can contaminate poultry meat during the slaughter process. The  
17 current standard methods to detect these pathogens at poultry farms use fecal dropping or boot  
18 swaps in combination with cultivation / PCR. In this study, we have used air filters in combination

19 with shotgun metagenomics for the detection of *Campylobacter* in poultry houses and MOCK  
20 communities to test the applicability of this approach for the detection of foodborne pathogens.

21

## 22 **Results:**

23 The spiked MOCK communities showed that we could detect as little as 200 CFU *Campylobacter* per  
24 sample using our protocols. Since we were interested in detecting *Campylobacter*, a DNA extraction  
25 protocol for Gram negative bacteria was chosen, and as expected, we found that the DNA extraction  
26 protocol created a substantial bias affecting the community composition of the MOCK communities.  
27 It can be expected that the same bias is present for poultry house samples analyzed. We observed  
28 significant amounts of *Campylobacter* on the air filters using both real-time PCR as well as shotgun  
29 metagenomics, irrespective of the amount of spiked in *Campylobacter* cells, suggesting that the  
30 flocks in both houses harboured *Campylobacter* spp.. Interestingly, in both houses we find diverse  
31 microbial communities present in the indoor air. In addition, have we tested the *Campylobacter*  
32 detection rate using shotgun metagenomics by spiking with different levels of *C. jejuni* cells in both  
33 the mock and the house samples. This showed that even with limited sequencing *Campylobacter* is  
34 detectable in samples with low abundance.

35

## 36 **Conclusions:**

37 These results show that air sampling of poultry houses in combination with shotgun metagenomics  
38 can detect and identify *Campylobacter* spp. present at low levels. This is important since early  
39 detection of *Campylobacter* in food production can help to decrease the number of food-borne  
40 infections.

41

42 **Keyword:** Microbial communities, metagenomics, Poultry, mock communities, spike controls,  
43 gelatine air filter

44

## 45 Background

46 *Campylobacter* spp. infection is one of the most frequently reported gastrointestinal infections of  
47 bacterial origin in Europe and worldwide [1, 2]. They cause campylobacteriosis with symptoms  
48 ranging from mild gastroenteritis to severe diarrhea. Complications can lead to a variety of diseases  
49 such as inflammatory bowel disease, reactive arthritis and Guillain-Barré syndrome [2]. For the genus  
50 *Campylobacter* more than 30 species and subspecies from several sources have been described and  
51 for many of these species the role as a human pathogenic bacteria is unclear [3]. Thermotolerant  
52 *Campylobacter* species, such as *C. jejuni* and *C. coli*, are most commonly associated with human  
53 infection and are often isolated from poultry and poultry products [1, 4]. *Campylobacter* has been  
54 isolated from the environment and a range of wild and domesticated animals, but poultry, especially  
55 broilers and laying hens, is considered as the main reservoir [5, 6]. In the EU, monitoring of  
56 *Campylobacter* is mandatory [7], and from 2018 monitoring of *Campylobacter* in broiler carcasses  
57 after chilling has been implemented in the member states [8]. In addition, to ensure a whole chain  
58 approach as recommended by EFSA, control measures should also be implemented at the farm level  
59 [9]. At present, on-farm sampling of poultry is carried out by sampling faecal droppings or using boot  
60 swabs, which are also widely used for *Salmonella* monitoring [10]. Interestingly, after *Campylobacter*  
61 colonize a flock, it is not only detected in faecal droppings and the litter, but also in the air inside the  
62 house. This knowledge was recently used to show that air sampling can be used as an alternative  
63 strategy for screening of *Campylobacter* in broiler flocks [11, 12]. Air sampling was demonstrated to  
64 detect the presence of *Campylobacter* and in some cases even earlier than the current conventional  
65 methods [11, 13, 14].

66 The air filters used, collect airborne material on a gelatin matrix, which is a product obtained from  
67 bovine or porcine skins and bones. The extraction process includes the use of extreme temperatures,  
68 pH and drying, which should create a sterile product. However, literature on contaminated gelatin  
69 indicates that common contaminants belong to thermotolerant, aerobic, endospore-forming  
70 bacteria. For instance, varieties of *Bacillus* species might be present, that are more resistant to the

71 processes used in gelatin production and can therefore survive [15]. Thus, gelatin membrane air  
72 filters are sterilized using gamma irradiation before use, which should kill all organisms present [13].  
73 Nonetheless, DNA of dead bacteria is likely still present in the gelatin matrix of the air filter.

74 In many air filter experiments, the collected airborne material is used for cultivation or specific PCR-  
75 based methods such as denaturing gradient gel electrophoresis (DGGE) or real-time PCR [11, 13, 16,  
76 17]. The efficiency of cultivation is however suboptimal for specific organisms. A study by  
77 Johannessen et al., indicated that cultivation of air filters often failed to detect *Campylobacter* spp. as  
78 compared to boot swabs [11]. A follow-up study by Hoorfar et al supported this observation. This is  
79 in contrast to a higher *Campylobacter* detection rate when real-time PCR is used directly on the air  
80 filters compared to the same assay used material collected from boot swabs [11, 12]. The reason for  
81 the latter difference might be that the material on air filter is “cleaner” and therefore contain less  
82 inhibitors affecting PCR reactions.

83 Air filtering can collect all the microorganisms present in the enclosed air of buildings, which makes it  
84 suitable for diversity studies applying either amplicon or shotgun sequencing. Several studies  
85 describe poultry farm air samples indicating presence of a diverse community present in the poultry  
86 house air. For instance, Dai et al., showed that a range of potentially pathogenic bacterial genera,  
87 such as *Corynebacterium*, *Escherichia* and *Staphylococcus* are present in Chinese poultry house air  
88 [9]. Most of these organisms are associated to particulate matter particles present in the air with a  
89 particle size diameter smaller than 2.5  $\mu\text{m}$  fraction [18]. Other studies using 16s rRNA DGGE profiling  
90 [16], shotgun sequencing [19], or cultivation [17] from material collected on air filters showed similar  
91 organisms being present in Canadian or Polish poultry houses. All these studies indicate a dominant  
92 airborne community dominated by Firmicute and Actinobacterial species, which are both phyla  
93 containing sporeformers [19]. In addition, it is also shown that these communities have a higher  
94 abundance of antibiotic resistance genes than found in the fecal material communities from which

95 the farm air dust is originating [19]. As such, the presence of potential pathogens in the air of poultry  
96 houses therefore possess a possible health risk for both animals and workers.

97 The chicken fecal material deposited on the farm floor is partly responsible, via aerosol formation,  
98 for the bacterial community present in the poultry farm air. Therefor the chicken fecal microbiome  
99 has an influence on the air microbiome. The chicken fecal microbiome consist of a variety of species  
100 belonging to the Actinobacteria, Bacteroidetes, Firmicutes and Proteobacteria [20–23]. At a finer  
101 taxonomic scale, the dominant taxa are *Lactobacillaceae*, *Ruminococcaceae* and *Enterobacteriaceae*  
102 in broiler fecal samples [23–25].

103 Pathogenic bacterial species such as *Acinetobacter*, *Campylobacter*, *Listeria*, *Proteus* and *Salmonella*,  
104 seem only present at low abundances in microbiomes from fecal material of healthy broiler flocks or  
105 are not present [23]. Interestingly, those taxa can be present on shells of eggs from the same animals  
106 that had a negative fecal sample [23]. Although fecal fluid can contaminate the eggshell, it is also  
107 possible that other sources, such as animal feathers, parental care, or even the environment could be  
108 responsible for the presence of pathogenic microbes. As such, sampling of fecal material might not  
109 give an adequate view of the presence of pathogens.

110 Here we tested the application of shotgun metagenomics on air filter samples spiked with mock  
111 communities and different numbers of *C. jejuni* to study the usefulness of the specific DNA extraction  
112 protocol as well as sequence depth in this study. In addition, air filter samples from two Norwegian  
113 poultry houses were tested as a proof of concept.

114

## 115 Results

116 Four gelatin air filters (“MOCK” samples) were split into halves and spiked with either 75 or 125 µl of  
117 a mock community consisting of cells from 10 different species in a log abundance distribution  
118 (Figure 1, Table 1). Two of the half filters spiked with mock community were further spiked with 200

119 CFU (colony forming units) of *C. jejuni* CCUG 11284T and another two with 20.000 CFU, while the  
120 remaining four halves were not spiked and used as negative controls. One air sample from each of  
121 the two poultry houses on the same farm were collected (“HOUSE”). Both filters were split in four  
122 pieces. One piece from each filter was not spiked, while the other three were spiked with three  
123 different levels of *C. jejuni* 927 (Figure 1, Table 1). All filter pieces were treated as separate samples.  
124 Real-time PCR was used to detect *Campylobacter* in all samples. *Campylobacter* was detected at  
125 approximately Cq 29 in the samples spiked with 20.000 CFU and at approximately 36 in the samples  
126 spiked with 200 CFU (Table 1). The MOCK samples that were not spiked with *Campylobacter* were all  
127 negative (two “No Cq” and two above our standard hard cutoff Cq value of 40, Table 1).  
128 *Campylobacter* was detected in all HOUSE samples including the non-spiked samples, demonstrating  
129 that both poultry houses harboured *Campylobacter*.

130

### 131 **Microbial community composition**

132 Microbial community composition of the air filter communities was determined using metagenomic  
133 shotgun sequencing (Table 2). In order to assess which fraction of the microbial communities was  
134 captured using shotgun sequencing we used Nonpareil3 [26]. This indicated that for the MOCK  
135 community samples we had reached sufficient coverage ( $> 0.97$ ), while the HOUSE samples with a  
136 chicken house background had an average coverage of 0.76. This result was expected as the MOCK  
137 communities only consisted of 10 species, while the HOUSE communities were natural samples with  
138 many more. Thus, in line with this, we find that the HOUSE samples showed a higher Nonpareil index  
139 of sequence diversity ( $N_d$ ) ( $19.3 \pm 0.1$ ) than the MOCK samples ( $17.6 \pm 0.2$ ) [26]. This index describes  
140 the community diversity in sequence space using a natural logarithm. The  $N_d$  found for our MOCK  
141 samples falls in the same range as Mock communities tested by the authors of Nonpareil3. Most  
142 host-associated communities tested in Rodriguez-R et al., show a  $N_d$  range between 17 and 22, and  
143 our HOUSE samples show similar  $N_d$  values [26].  
144 The taxonomic community composition of the air filter communities was analyzed using Kraken [27].

145 For the MOCK communities we found that on average 9 % of the reads were unclassified, while for  
146 the HOUSE communities this was 48.8 %. At the phylum level we detect 10 taxa with a relative  
147 abundance  $\geq 0.01$  % in most of the samples (Supplementary materials figure S1). Firmicutes and  
148 Proteobacteria dominated the MOCK samples, while in the HOUSE samples we found the same  
149 together with the phyla Actinobacteria and Bacteroidetes. The other eight phyla were all present in  
150 the HOUSE samples at relative abundances below 0.02 % except for Deinococcus-Thermus (average  
151 relative abundance =  $0.023 \pm 0.003\%$ ). The later thermophilic phylum was present in all our samples  
152 and was likely a contaminant from the air filter gelatin matrix.

153 The main bacterial genera found in the MOCK samples were *Listeria* and *Pseudomonas* and they  
154 showed relative abundances deviating from the expected abundance (Figure 2). Both taxa were  
155 predicted to have abundances of 89.9% and 8.9%, but instead show relative abundances of 37.9%  
156 ( $\pm 13.5$ ) vs 42.7% ( $\pm 14.8$ ). This indicates that our DNA extraction protocol, aimed to extract DNA from  
157 Gram-negative bacteria, caused an underestimation of Gram-positive bacteria in our samples.

158 In the HOUSE samples we found a diverse group of different genera with some known to contain  
159 pathogenic species (Figure 2). The dominant taxa were *Brevibacterium*, *Brachybacterium*,  
160 *Bacteroides*, *Corynebacterium*, *Lactobacillus*, *Staphylococcus*, *Faecalibacterium*, and *Helicobacter*.  
161 Most taxa were found with similar abundances in both houses, but a few had higher abundances in  
162 the HOUSE 2 samples (Figure 2). Those taxa were *Bacteriodes*, *Alistipes* and *Megamonas*. Overall,  
163 there is a high reproducibility between the samples from a single house.

164 A few genera are especially notable, since they were detected in both HOUSE and MOCK samples  
165 (Figure 2). A more detailed analysis showed that all samples contain several thermophilic bacteria,  
166 e.g. *Aeribacillus*, *Meiothermus* and the Betaproteobacterial genus *Cupriavidus*, while the MOCK  
167 samples also contained the Betaproteobacterial genus *Burkholderia*. Since these genera are not part  
168 of the MOCK community, it is likely that they are contaminants present in the gelatin matrix of the air  
169 filter. Interestingly, *Cupriavidus* was present with more than 1 million reads (max 4 Million) in the

170 HOUSE samples, while in the MOCK communities they only showed up with on average 0.5 million  
171 reads. Although the MOCK communities were created using only 10 distinct species, we detected  
172 many more species although most were in low abundance (< 0.01%). These classifications are likely  
173 due to misclassifications. For instance, in the MOCK communities that were not spiked with  
174 *Campylobacter*, we consistently detected this genus using Kraken with an average classified read  
175 count of 43 (Figure 3A). A similar number was identified when we mapped the metagenomics reads  
176 against a collection of *Campylobacter* genomes and the two genomes of our isolates used for spiking  
177 (Figure 3B). This indicates a consistent detection irrespective of the method used for detection. For  
178 the MOCK communities spiked with 200 or 20000 CFUs we could classify on average 100 or 6825  
179 reads respectively. These results indicate that species detected using Kraken with close to 50 reads or  
180 less are likely not present in our samples, and should be ignored. Nonetheless, even with the  
181 restriction that a species has to be present in all MOCK samples with more than 100 reads, we still  
182 find 121 genera present.

183

#### 184 *Campylobacter* detection of communities spiked with *C. jejuni*

185 We used both Kraken taxonomic classification as well as mapping with BBsplit to isolate genomes to  
186 identify *Campylobacter* spiked into MOCK and HOUSE samples. Both methods identified reads  
187 matching to *C. jejuni*, but since the genomes were not available, neither Kraken not BBsplit could  
188 differentiate at the strain level for the two strains used for spiking. We thus sequenced the two  
189 isolates *C. jejuni* 927 and *C. jejuni* CCUG 11284T with Illumina HiSeq 3000 and used the resulting  
190 assemblies to map our metagenomics reads.

191 The draft assemblies for *C. jejuni* 927 and *C. jejuni* CCUG 11284T were submitted to ENA (accession  
192 numbers: CAJPVE01; CAJQFQ01) and have a genome size of 1.59 Mbp and 1.73 Mbp respectively  
193 (Supplementary table 1). We used the Tetra correlation search at the JspeciesWS webserver [28] to  
194 identify the taxonomically closest known isolates for our strains. These isolates are *C. jejuni* subsp.  
195 *jejuni* 327 for 927 (Average Nucleotide Identity (ANI): 100.00) and *C. jejuni* subsp. *jejuni* ATCC33560



196 for CCUG 11284T (ANI: 99.66). The match for CCUG 11284T indicates the same strain but with a  
197 different culture collection identifier. The ANI value between 927 and CCUG 11284T is 97.5%.

198 With the mapping approach, we find a clear difference between the samples on how abundant either  
199 spike isolate was (Figure 3B). In the MOCK samples that was spiked with CCUG 11284T we find reads  
200 uniquely matching *C. jejuni* 927 (Figure 3B). Likewise, reads with a unique match to CCUG 11284T  
201 were found in the HOUSE samples that were spiked with *C. jejuni* 927. In addition, do we find many  
202 more *Campylobacter* species in the HOUSE samples (Figure 3A, Supplemental figure S2B).

203

## 204 Discussion

### 205 *Campylobacter* detection using metagenomics

206 The prevention of gastrointestinal disease due to foodborne pathogens requires early and sensitive  
207 detection of pathogens along the food production chain. For pathogens such as *Campylobacter* spp.,  
208 it is important to identify the presence at the farm to prevent (or limit) further contamination. The  
209 current method for on-farm sampling of poultry is by boot swabs of the floor environment, including  
210 fecal droppings, analyzed by either cultivation or real-time PCR. These methods may have limitations  
211 in their application due to cultivation bias or PCRs limitation to one target per assay. In recent years,  
212 shotgun metagenomics has been shown to be able to detect a large variety of microbes without  
213 cultivation and as such, it can be used to identify multiple pathogens simultaneously. Furthermore,  
214 air sampling at poultry farms combined with PCR detection indicated earlier detection of pathogens  
215 that conventional sampling [11, 12]. In addition, the DNA isolates from the air samples did contain  
216 less PCR inhibitors. Thus, combining metagenomics with air sampling could help to identify a variety  
217 of pathogens without being affected by cultivation biases.

218 Here, we used real-time PCR and metagenomic shotgun sequencing to analyze microbial  
219 communities present in MOCK and HOUSE samples with a specific focus on the detection of  
220 *Campylobacter*. With real-time PCR we were able to detect *Campylobacter* in the MOCK communities

221 when spiked with two different levels (Table 1). For the HOUSE samples we found Cq values between  
222 29 and 33, with the lower values in the non-spiked samples (Table 1). The detection of  
223 *Campylobacter* in the non-spiked sair filters demonstrated that both poultry houses were infected  
224 with *Campylobacter*. These results were also confirmed by cultivation of boot swabs sampled  
225 simultaneously as the air samples from the two houses [11].

226 With the shotgun data we used two different approaches to identify *Campylobacter* spp. in our  
227 samples (Figure 3). The classification approach with Kraken showed that the HOUSE samples had  
228 between 100 and 300 reads / million reads that could be classified to *Campylobacter* spp.  
229 Interestingly, BBsplit mapped between 40 and 170 reads / million reads to both genomes of the  
230 spiked isolates, which is a slightly smaller fraction of the metagenomics datasets. BBsplit was used  
231 with a with a variety of *Campylobacter* spp genome, and it only counts reads mapping  
232 unambiguously to a single genome. When a read would map equally well to multiple genomes it was  
233 not counted. Interestingly, the mapping showed that in the HOUSE samples strains *C. jejuni* CCUG  
234 11284T and 927 were found. The latter was spiked into these samples, while the former was used in  
235 the MOCK communities as a spike. This suggests the presence of *C. jejuni* strains sharing genomic  
236 similarity with CCUG 11284T in the HOUSE samples. An additional 0.03 % of reads mapped to a  
237 variety of other *Campylobacter* spp. including a third *C. jejuni* (NCTC 11168) reference genome  
238 (Supplementary materials Figure S2). In contrast, we only find few reads (<1 read / million reads ) in  
239 the MOCK samples that were assigned to *C. jejuni* 927, while 3 (200 CFU) to 300 reads / million reads  
240 (20.000 CFU) were assigned to *C. jejuni* CCUG 11284T in the spiked samples.

241 Our results suggest that both Kraken and BBsplit can be used to identify *Campylobacter* spp. in the  
242 air of Poultry houses as does real-time-PCR [11]. The added value of using shotgun metagenomics for  
243 detection is the possibility to identify a variety of *Campylobacter* species and other bacteria of  
244 interest present at a farm, which is not possible with single 16s rRNA based real-time PCR. However,  
245 our metagenomic results also indicate that interpretation of such data should be done with care. For  
246 instance, the BBsplit results suggests the presence of a large number of different species

247 (supplementary materials Figure S2), while Kraken predominantly identified *C. jejuni* (Figure 3). Some  
248 of the species genomes used in the BBsplit mapping approach have very distinct host ranges. For  
249 instance, the species *C. fetus*, *C. hyointestinalis* and *C. iguaniorum* are associated with other hosts  
250 [29–31] and because of that it seems unlikely that they are present in our samples. Others like *C.*  
251 *jejuni* are known to be genomically versatile with broad ecological/ host ranges, including wild birds,  
252 livestock and humans [32, 33]. In addition, *Campylobacter* spp. are known for their high rate of  
253 horizontal gene transfer making it likely that environmental isolates from different species might  
254 contain genome regions shared by multiple species [34, 35]. That makes it difficult to identify these  
255 different species unambiguously and caution is needed for the interpretation. Nonetheless, by using  
256 two different approaches we show that multiple *Campylobacter* species are likely present in the air  
257 of our HOUSE samples and that most are at low abundance.

258

### 259 Air sample microbiomes vs broiler fecal microbiomes

260 The microbiome composition of the air in poultry houses is related, but not similar, to the fecal  
261 microbiome composition. After deposition of the feces on the litter layer in the house the  
262 microbiome composition likely changes in community composition and only a part of the community  
263 becomes airborne. In our analysis, we find a highly diverse community present in the air, with several  
264 genera also known to be present in the broiler feces. Typical genera found in broiler feces are  
265 *Bacteriodes*, *Brevibacterium*, *Corynebacterium*, *Enterococcus*, *Lactobacillus* and *Staphylococcus* [22–  
266 24, 36, 37]. These taxa were also identified in our air sample microbiomes of the poultry houses as  
267 well as in other studies using different detection methods [16–18]. That suggests that the air  
268 microbiome in poultry houses can be used as a proxy for the fecal microbiome. It also implies that  
269 the poultry house air contains many of the microbes associated with the animals and as such gives a  
270 good overview of the microbiome of the entire flock. Interestingly, many of the genera identified in  
271 our analysis are known gut microbiome species, but not all of them. *Brachybacterium* spp. for  
272 instance can be isolated from a wide range of sources including poultry litter, Gouda cheese, oil brine

273 or via air sampling [38, 39]. Not unexpected, *Brachybacterium* spp. have also been identified in the  
274 dust from poultry farms [18]. They have been rarely identified as pathogenic agents in humans [40].  
275 The same is true for the genera *Dietzia* and *Pseudomonas*, which are both widely distributed bacteria  
276 that can be opportunistic pathogens [41]. Interestingly, *Pseudomonas* spp. can regularly be found in  
277 chicken fecal material as well as the air of poultry houses and are of concern for food production [17,  
278 23, 42, 43]. These results therefore indicate that shotgun metagenomics of air samples provide a  
279 suitable approach to monitor poultry farms for a wide variety of pathogens.

280

### 281 Sensitivity of air sample metagenomics

282 The use of air sampling combined with real-time PCR or sequencing to detect pathogens at poultry  
283 farms has clear benefits over the gold standard with boot swabs with respect to the higher sensitivity  
284 and faster throughput [11, 12]. An additional advantage is that the potential to use the same samples  
285 to study all the microbial species present with metagenomic approaches. However, there is some  
286 pitfalls for these approaches. The first factor is the low input amount of DNA collected by this  
287 technique. Such samples are highly sensitive to contaminants from kits and reagents themselves, in  
288 addition to laboratory contamination [44, 45].

289 In addition, the DNA extraction method can introduce bias. Here, we used a method aimed at Gram-  
290 negative bacteria and specifically at lysing the cells from *Campylobacter* spp.. Using MOCK  
291 communities, as expected we find a large difference between the expected and observed MOCK  
292 community composition of the samples. This was especially clear for the abundances of *L.*  
293 *monocytogenes* and *P. aeruginosa*, which had a predicted relative abundance of 89 vs 8.9 %, but  
294 instead show an almost equal abundance in this experiment (Figure 2, supplementary figure S3). This  
295 was most likely due to the gram positive *L. monocytogenes* DNA being extracted with lower efficiency  
296 than the gram negative *P. aeruginosa*. Nonetheless, in the HOUSE samples, we do find many gram-  
297 positive bacterial genera, but the relative abundance of these taxa is likely underestimated relative

298 to Gram-negative bacteria. This underscores the importance of including mock communities in  
299 microbiome studies, in order to understand the DNA extraction bias for particular communities.

300 Our results suggest that the gelatine filters contain DNA despite the fact that these filters are gamma  
301 sterilized [15]. Gelatine production is a harsh, but not a sterile process, which requires sterilization  
302 before shipment of such filters. By using mock communities we were able to identify several  
303 contaminating genera likely present in the gelatin matrix of the air filter. The taxa *Meiothermus*,  
304 *Aeribacillus* and *Burkholderia* could be found in all MOCK samples and with similar abundances in  
305 some of the HOUSE samples. More interestingly, we also find a high abundance of *Cupriavidus* in all  
306 samples, which strongly suggests this is a contaminant genus. This *Burkholderiales* genus, together  
307 with *Burkholderia* and the sister genus *Ralstonia* can be found as contaminants in microbiome  
308 studies, as shown previously [44, 46]. This genus has also been found in another air sampling study of  
309 poultry houses where polyvinyl chloride filters were used [16], but there is no indication that the  
310 authors of that study controlled for contamination by analyzing clean filters. Thus, it is unclear if this  
311 genus is part of the poultry house microbiome as indicated by Just et al [16], or that it is also present  
312 as a contaminant in their non-gelatine filters. Since we observe *Cupriavidus* in all our air filter  
313 samples it is unlikely that this genus is present in the poultry house, but rather introduced into the  
314 samples via the gelatin matrix or through laboratory handling. What is clear from our analysis is that  
315 contaminating species in air filter experiments are present and easily detected when using mock  
316 communities or even negative samples. This indicates a need to include such sample types in all  
317 microbiome experiments using air sampling, to be able to filter out contamination from the filters.

318

### 319 [Application of air sampling](#)

320 Our study showed that air sampling indoor air of poultry houses together with shotgun metagenomic  
321 sequencing can be used to detect pathogenic microorganisms. This approach can be used to study a  
322 various of pathogens, moulds, antimicrobial resistance in environments where a high hygiene

323 standard is required [19, 47]. These findings indicate that in i.e. animal production facilities, slaughter  
324 houses or in the food industry airborne pathogens and their resistome might cause health concerns  
325 for the humans working in such spaces [17, 48]. Likewise, the animals in these facilities are also  
326 exposed to the same potential pathogens that are present in the air [18, 49]. With the increasing  
327 availability of shotgun metagenomics, it becomes possible to monitor animal house facilities for a  
328 wide variety of pathogens without the limits in detection when using cultivation or dedicated PCR  
329 approaches. This enables the industry not only to monitor for pathogens that can cause foodborne  
330 outbreaks at an early stage, but it could also stimulate the development of intervention methods to  
331 reduce the proliferation of such pathogens at the farm level. In addition, these approaches can help  
332 to improve the animal health by developing measures to reduce the exposure to a wide variety of  
333 potential pathogens. Such measures could include better regulation of the indoor climate of poultry  
334 houses. The extra benefit of such developments is that the working conditions for humans at those  
335 farms might improve as well.

336 Nonetheless, to really make use of the power of metagenomics in an industrial monitoring set-up, it  
337 will be needed to further reduce the cost of this method, and to develop analysis approaches that  
338 are both user friendly and easy to use for non-bioinformaticians. Finding potential pathogens in the  
339 air of poultry farms might cause concern, but since many of the organisms found are also part of the  
340 healthy fecal microbiome of chicken it is difficult to identify at what level pathogen detection might  
341 require intervention. These difficulties require further investigations in order to improve the  
342 sensitivity and specificity of metagenomic detection methods.

343

## 344 Conclusions

345 Here we used shotgun metagenomics and real-time PCR to study the microbial community present in  
346 the air of poultry houses. Our results indicate the presence of a diverse community that contains  
347 many genera that are also found in the chicken fecal microbiome. This shows that air sampling of

348 poultry house air combined with shotgun metagenomics can be used as a proxy for the study of the  
349 fecal microbiome of the flock present in a farm house. The shotgun metagenomics results allowed us  
350 to identify *Campylobacter* spp. present at low levels, as well as other pathogenic microbes that could  
351 be of health concern. By using mock communities, we address some technical limitations that can  
352 help data analysis and interpretation of data generated with the air sampling method. Those include  
353 DNA extraction biases due to the extraction method chosen, as well as the background  
354 contamination of the samples due to laboratory handling and/or background DNA present in the  
355 gelatin matrix of the filters.

356 By using air sampling methods with shotgun metagenomics it will be possible to study the microbial  
357 communities associated with animal production and food industry with emphasis on the presence of  
358 microbes considered as food-borne pathogens. Understanding the dynamics of microbial  
359 communities present in poultry houses will help to identify processes to reduce to the introduction  
360 of pathogens in the poultry production as well to improve poultry and human worker health.

361

## 362 **Methods**

### 363 **Sample collection**

364 Air filters from two Norwegian broiler houses on the same farm were collected using an AirPort MD8  
365 device (Sartorius Stedim Biotech, France) with disposable gelatin filters (80 mm diameter; Sartorius,  
366 17528-80ACD) as described by Johannessen and coworkers [11], one from each house. The filters  
367 collected were used for spiking as described below.

### 368 **Preparation of artificially contaminated air filters**

369 Four gelatin membrane filters were divided into two pieces each (Table 1, Figure 1). Six half filters  
370 were spiked with 75  $\mu$ l of microbial community standard (MOCK), and two half filters were spiked  
371 with 125  $\mu$ l of the same standard. The microbial community standard (MOCK) used in this study has a  
372 log abundance distribution of different bacterial species and fungi ranging from  $10^8$  to  $10^2$  cells

373 (ZymoBIOMICS Microbial Community Standard II, ZYMO RESEARCH EUROPE GMBH, Freiburg,  
374 Germany) and is well suited for assessing the accuracy of composition and ideal for the quality  
375 control of microbiome measurements. In addition, we spiked four of the half filters already spiked  
376 with mock communities, with two different concentrations of *C. jejuni subsp. jejuni CCUG 11284T*  
377 (Accession number CAJQFQ01) (200 and 20.000 cfu) (Table 1). One air filter collected from each of  
378 two broiler houses (see above) were divided into quarters and spiked with three different  
379 concentrations of *C. jejuni 927* (Accession number CAJPVE01) (5600, 560 and 56 cfu) (Table 1). One  
380 quarter of each filter was not inoculated with *C. jejuni 927* and will reflect the content of the real  
381 sample (Figure 1).

382 The DNA extraction is performed as previously described in Hoorfar et al., 2020 [12]. Briefly, air filters  
383 were pretreated for DNA extraction as follows; half a filter was dissolved in 3.5 ml ddH<sub>2</sub>O and 100 µl  
384 alkaline protease (Protex 6L, Genencor International BA, The Netherlands) was added. The samples  
385 were mixed by vortexing until the filters were dissolved. The samples were then incubated at 37°C in  
386 a thermal mixer for 6 min at 1000 rpm, centrifuged at 4°C for 5 min at 8000 x g and the supernatant  
387 discarded. The pellet was used for DNA extraction using the Gram-negative protocol for DNeasy  
388 Blood and Tissue kit (Qiagen) with some minor modifications described briefly below. The incubation  
389 period at 56°C was set to one hour for all samples and all samples were treated with 4 µl RNase A  
390 (100 mg/ml, Qiagen). DNA was eluted in 100 µl TE buffer with 0.1 mM EDTA. The DNA quantity was  
391 determined by using the high sensitivity DNA Qubit assay (ThermoFisher Scientific) and DNA quality  
392 was assessed, if enough DNA, by using Nanodrop spectrophotometer (ThermoFisher Scientific).

393 DNA from the two *C. jejuni* strains used for spiking were extracted using QIAamp DNA Mini  
394 kit (Qiagen) according to the manufacturer's protocol. DNA quantity and quality was determined by  
395 using the broad range DNA Qubit assay and Nanodrop spectrophotometer. The DNA from the two *C.*  
396 *jejuni* isolates was whole genome sequenced using the same protocols as for the metagenomic  
397 samples, for details see below under metagenomic library preparation and sequencing.



### 398 *Real-time PCR for Campylobacter*

399 Real-time PCR was performed with forward primer 5'-CTGCTTAACACAAGTTGAGTAGG-3' and reverse  
400 primer TTCCTTAGGTACCGTCAGAA as combined and optimized by Lübeck *et al* (xx) with LNA probe 5'-  
401 6FAM CA[T]CC[T]CCACGCGGCG[T]TGC BHQ1-3' [50–53]. Shortly, 500 nM primers and 300 nM  
402 probe were added to Brilliant III Ultra-Fast QPCR mastermix (Agilent) or Tth DNA polymerase  
403 mastermix (containing: 1x PCR buffer for Tth DNA polymerase, 25 mM MgCl<sub>2</sub>, 7% glycerol, 0.6 mM  
404 dNTPs, 0,2 mg BSA and 1 U Tth polymerase). For the Brilliant mastermix was the cycling conditions  
405 were 95° degrees for 3 minutes followed by 45 cycles of 95° degrees for 5 seconds and 60° degrees  
406 for 15 seconds. For the Tth DNA polymerase mastermix was the cycling conditions were 95° degrees  
407 for 3 minutes followed by 45 cycles of 95° degrees for 15 seconds, 60° degrees for 60 seconds and  
408 72° degrees for 30 seconds. In both cases a CFX96 instrument (Bio-Rrad) was used.

### 409 *Metagenomic library preparation & metagenomics shotgun sequencing*

410 Metagenomic shotgun libraries were prepared at the Norwegian Sequencing Centre (Oslo, Norway)  
411 from the air filter DNA extracts and the two *C. jejuni* isolates. DNA was mechanically fragmented  
412 using sonication to 350 bp (Covaris) and Dual indexed libraries were generated using  
413 SMARTer ThruPLEX (Takara) adapted to low-input DNA. The libraries were sequenced on a HiSeq  
414 3000 (Illumina) generating 150 bp Paired end reads.

### 415 *Genome assembly of Campylobacter genomes.*

416 The *Campylobacter* sequence data was processed with the Bifrost pipeline [54]  
417 (<https://github.com/NorwegianVeterinaryInstitute/Bifrost>) with modifications. In  
418 brief, PhiX sequences were removed using BBmap (v 38.76) [55], adapter sequences and low  
419 quality bases were removed using Trimmomatic (v 0.39) [56]. Assembly was performed  
420 with Skesa (v 2.3.0) [57], using default settings. Due to the very high coverage (> 2000 X, we  
421 screened the contigs for contamination using Kraken2 (v 2.0.8\_beta) [58] and a Minikraken database  
422 containing Refseq microbial genomes. We identified a contaminant *Staphylococcus epidermis*  
423 genome (accession number: CAJPFV01) in the *C. jejuni* 927 assembly that was present as ≈ 1% of the  
424 reads. All non-Campylobacter contigs were removed from the *C. jejuni* 927 assembly. Next, we

425 use Pilon (v 1.23) [59] to correct the assemblies of both isolates and Prokka (v 1.14.5) [60] was used  
426 to annotate both genomes.

#### 427 *Metagenomic data quality control and classification*

428 Metagenome sequence data quality control was performed using the Sunbeam pipeline (v 2.1.0) [61]  
429 (Supplementary materials figure S4). In brief, the pipeline runs Cutadapt (v 2.8) and Trimmomatic (v  
430 0.36) to remove adapters and low quality bases. Next, low-complexity regions are masked using  
431 Komplexity (v 0.3.6) and subsequently host contamination filtering was performed to remove read  
432 matching both the PhiX (NC\_001422.1) and a masked version of the human genome (Hg19,  
433 <https://drive.google.com/file/d/0B3lHR93L14wd0pSSnFULUlhCuk/edit?usp=sharing>).

434 The sequence depth for the individual samples was estimated using Nonpareil (version3) [26].  
435 Taxonomic classification was performed using Kraken (v 1.0 ) [27]. Species abundances were  
436 subsequently estimated using Bracken (v2.6.0) [62].

#### 437 *Mapping of metagenome sequences*

438 Species abundances based on reads were also determine in the following way: a collection of fasta  
439 sequences was downloaded that included the mock community species genomes  
440 (<https://s3.amazonaws.com/zymo-files/BioPool/ZymoBIOMICS.STD.refseq.v2.zip>), 29 Complete  
441 *Campylobacter* spp. reference genomes from Refseq (downloaded 25-11-2020, Supplementary table  
442 S1 ), and the *Gallus gallus* reference genome version 6 (GCA\_000002315.5). We also added the  
443 genome of *C. coli* NTIC13 (GCF\_009756375.1). All genomes were masked using BBmask (BBTools  
444 version 38.86), with entropy set to 0.7 [55]. Metagenomic reads were mapped against the masked  
445 genomes using BBsplit with default settings and discarding reads with ambiguous mapping within a  
446 genome or between genomes. A summary of the mapped reads per genome was used for  
447 visualization.

448

## 449 *Visualization of the results*

450 The figures were created using R-studio (version 1.3.959) with R (version 4.0.0). The following R-

451 packages were used to process data tables and generate figures: dplyr (v1.0.2), forcats (v 0.5.0),

452 ggplot2 (v3.3.2), purr (v 0.3.4) , readr (v1.4.0), tidyr (v1.1.2).

## 453 *References*

- 454 1. European Food Safety Authority, European Centre for Disease Prevention and Control (ECDC). The  
455 European Union summary report on trends and sources of zoonoses, zoonotic agents and food-borne  
456 outbreaks in 2014. EFSA Journal. 2015;13. doi:10.2903/j.efsa.2015.4329.
- 457 2. The global view of campylobacteriosis. Expert consultation. Geneva: World Health Organization;  
458 2013.
- 459 3. Costa D, Iraola G. Pathogenomics of emerging *Campylobacter* species. Clin Microbiol Rev. 2019;32.  
460 doi:10.1128/CMR.00072-18.
- 461 4. EFSA Panel on Biological Hazards (BIOHAZ). Scientific Opinion on Quantification of the risk posed  
462 by broiler meat to human campylobacteriosis in the EU. EFSA Journal. 2010;8:1437.  
463 doi:10.2903/j.efsa.2010.1437.
- 464 5. Bailey RA, Kranis A, Psifidi A, Watson KA, Rothwell L, Hocking PM, et al. Colonization of a  
465 commercial broiler line by *Campylobacter* is under limited genetic control and does not significantly  
466 impair performance or intestinal health. Poult Sci. 2018;97:4167–4176. doi:10.3382/ps/pey295.
- 467 6. European Food Safety Authority. Technical specifications on harmonised epidemiological  
468 indicators for biological hazards to be covered by meat inspection of poultry. EFSA Journal. 2012;10.  
469 doi:10.2903/j.efsa.2012.2764.
- 470 7. European Parliament and the Council. Directive 2003/99/EC of the European Parliament and of the  
471 Council of 17 November 2003 on the monitoring of zoonoses and zoonotic agents, amending Council  
472 Decision 90/424/EEC and repealing Council Directive 92/117/EEC. OJ. 2003;L325:31–40.
- 473 8. European Commission. COMMISSION REGULATION (EU) 2017/1495-of 23 August 2017-amending  
474 Regulation (EC) No 2073/2005 as regards *Campylobacter* in broiler carcasses. European Journal of the  
475 European Union. 2017.
- 476 9. EFSA Panel on Biological Hazards (BIOHAZ), Koutsoumanis K, Allende A, Alvarez-Ordóñez A, Bolton  
477 D, Bover-Cid S, et al. Update and review of control options for *Campylobacter* in broilers at primary  
478 production. EFSA J. 2020;18:e06090. doi:10.2903/j.efsa.2020.6090.
- 479 10. International Organization for Standardization. ISO - ISO 10272-1:2017 - Microbiology of the food  
480 chain — Horizontal method for detection and enumeration of *Campylobacter* spp. — Part 1:  
481 Detection method. 2017. <https://www.iso.org/standard/63225.html>. Accessed 14 Oct 2020.
- 482 11. Johannessen GS, Garofolo G, Di Serafino G, Koláčková I, Karpíšková R, Wiczorek K, et al.  
483 *Campylobacter* in chicken - Critical parameters for international, multicentre evaluation of air  
484 sampling and detection methods. Food Microbiol. 2020;90:103455. doi:10.1016/j.fm.2020.103455.
- 485 12. Hoorfar J, Koláčková I, Johannessen GS, Garofolo G, Marotta F, Wiczorek K, et al. A multicenter  
486 proposal for a fast tool to screen biosecure chicken flocks for the foodborne pathogen  
487 *Campylobacter*. Appl Environ Microbiol. 2020;86. doi:10.1128/AEM.01051-20.
- 488 13. Søndergaard MSR, Josefsen MH, Löfström C, Christensen LS, Wiczorek K, Osek J, et al. Low-cost  
489 monitoring of *Campylobacter* in poultry houses by air sampling and quantitative PCR. J Food Prot.  
490 2014;77:325–330. doi:10.4315/0362-028X.JFP-13-268.
- 491 14. Olsen KN, Lund M, Skov J, Christensen LS, Hoorfar J. Detection of *Campylobacter* bacteria in air  
492 samples for continuous real-time monitoring of *Campylobacter* colonization in broiler flocks. Appl  
493 Environ Microbiol. 2009;75:2074–2078. doi:10.1128/AEM.02182-08.

- 494 15. De Clerck E, Vanhoutte T, Hebb T, Geerinck J, Devos J, De Vos P. Isolation, characterization, and  
495 identification of bacterial contaminants in semifinal gelatin extracts. *Appl Environ Microbiol.*  
496 2004;70:3664–3672. doi:10.1128/AEM.70.6.3664-3672.2004.
- 497 16. Just N, Kirychuk S, Gilbert Y, Létourneau V, Veillette M, Singh B, et al. Bacterial diversity  
498 characterization of bioaerosols from cage-housed and floor-housed poultry operations. *Environ Res.*  
499 2011;111:492–498. doi:10.1016/j.envres.2011.01.009.
- 500 17. Bródka K, Kozajda A, Buczyńska A, Szadkowska-Stańczyk I. The variability of bacterial aerosol in  
501 poultry houses depending on selected factors. *Int J Occup Med Environ Health.* 2012;25:281–293.  
502 doi:10.2478/S13382-012-0032-8.
- 503 18. Dai P, Shen D, Tang Q, Huang K, Li C. PM2.5 from a broiler breeding production system: The  
504 characteristics and microbial community analysis. *Environ Pollut.* 2020;256:113368.  
505 doi:10.1016/j.envpol.2019.113368.
- 506 19. Luiken REC, Van Gompel L, Bossers A, Munk P, Joosten P, Hansen RB, et al. Farm dust resistomes  
507 and bacterial microbiomes in European poultry and pig farms. *Environ Int.* 2020;143:105971.  
508 doi:10.1016/j.envint.2020.105971.
- 509 20. Skarżyńska M, Leekitcharoenphon P, Hendriksen RS, Aarestrup FM, Wasyl D. A metagenomic  
510 glimpse into the gut of wild and domestic animals: Quantification of antimicrobial resistance and  
511 more. *PLoS One.* 2020;15:e0242987. doi:10.1371/journal.pone.0242987.
- 512 21. Locatelli A, Hiatt KL, Caudill AC, Rothrock MJ. Do fecal and litter microbiomes vary within the  
513 major areas of a commercial poultry house, and does this affect sampling strategies for whole-house  
514 microbiomic studies? *Journal of Applied Poultry Research.* 2017;26:325–336.  
515 doi:10.3382/japr/pfw076.
- 516 22. Videnska P, Rahman MM, Faldynova M, Babak V, Matulova ME, Prukner-Radovic E, et al.  
517 Characterization of egg laying hen and broiler fecal microbiota in poultry farms in Croatia, Czech  
518 Republic, Hungary and Slovenia. *PLoS One.* 2014;9:e110076. doi:10.1371/journal.pone.0110076.
- 519 23. Trudeau S, Thibodeau A, Côté J-C, Gaucher M-L, Fravallo P. Contribution of the broiler breeders’  
520 fecal microbiota to the establishment of the eggshell microbiota. *Front Microbiol.* 2020;11:666.  
521 doi:10.3389/fmicb.2020.00666.
- 522 24. Siegerstetter S-C, Petri RM, Magowan E, Lawlor PG, Zebeli Q, O’Connell NE, et al. Feed restriction  
523 modulates the fecal microbiota composition, nutrient retention, and feed efficiency in chickens  
524 divergent in residual feed intake. *Front Microbiol.* 2018;9:2698. doi:10.3389/fmicb.2018.02698.
- 525 25. Bauer BW, Radovanovic A, Willson N-L, Bajagai YS, Hao Van TT, Moore RJ, et al. Oregano: A  
526 potential prophylactic treatment for the intestinal microbiota. *Heliyon.* 2019;5:e02625.  
527 doi:10.1016/j.heliyon.2019.e02625.
- 528 26. Rodriguez-R LM, Gunturu S, Tiedje JM, Cole JR, Konstantinidis KT. Nonpareil 3: fast estimation of  
529 metagenomic coverage and sequence diversity. *mSystems.* 2018;3. doi:10.1128/mSystems.00039-18.
- 530 27. Wood DE, Salzberg SL. Kraken: ultrafast metagenomic sequence classification using exact  
531 alignments. *Genome Biol.* 2014;15:R46. doi:10.1186/gb-2014-15-3-r46.
- 532 28. Richter M, Rosselló-Móra R, Oliver Glöckner F, Peplies J. JSpeciesWS: a web server for prokaryotic  
533 species circumscription based on pairwise genome comparison. *Bioinformatics.* 2016;32:929–931.  
534 doi:10.1093/bioinformatics/btv681.
- 535 29. Gilbert MJ, Duim B, Zomer AL, Wagenaar JA. Living in cold blood: *Arcobacter*, *Campylobacter*, and  
536 *Helicobacter* in reptiles. *Front Microbiol.* 2019;10:1086. doi:10.3389/fmicb.2019.01086.
- 537 30. Nadin-Davis SA, Chmara J, Carrillo CD, Amoako K, Goji N, Duceppe M-O, et al. A comparison of  
538 fourteen fully characterized mammalian-associated *Campylobacter fetus* isolates suggests that loss of  
539 defense mechanisms contribute to high genomic plasticity and subspecies evolution. *PeerJ.*  
540 2021;9:e10586. doi:10.7717/peerj.10586.

- 541 31. Wilkinson DA, O'Donnell AJ, Akhter RN, Fayaz A, Mack HJ, Rogers LE, et al. Updating the genomic  
542 taxonomy and epidemiology of *Campylobacter hyointestinalis*. *Sci Rep*. 2018;8:2393.  
543 doi:10.1038/s41598-018-20889-x.
- 544 32. Epping L, Antão E-M, Semmler T. Population biology and comparative genomics of *Campylobacter*  
545 species. *Curr Top Microbiol Immunol*. 2021;431:59–78. doi:10.1007/978-3-030-65481-8\_3.
- 546 33. Weis AM, Storey DB, Taff CC, Townsend AK, Huang BC, Kong NT, et al. Genomic comparison of  
547 *Campylobacter* spp. and their potential for zoonotic transmission between birds, primates, and  
548 livestock. *Appl Environ Microbiol*. 2016;82:7165–7175. doi:10.1128/AEM.01746-16.
- 549 34. Golz JC, Stingl K. Natural competence and horizontal gene transfer in *Campylobacter*. *Curr Top*  
550 *Microbiol Immunol*. 2021;431:265–292. doi:10.1007/978-3-030-65481-8\_10.
- 551 35. Iraola G, Pérez R, Naya H, Paolicchi F, Pastor E, Valenzuela S, et al. Genomic evidence for the  
552 emergence and evolution of pathogenicity and niche preferences in the genus *Campylobacter*.  
553 *Genome Biol Evol*. 2014;6:2392–2405. doi:10.1093/gbe/evu195.
- 554 36. Díaz-Sánchez S, Perrotta AR, Rockafellow I, Alm EJ, Okimoto R, Hawken R, et al. Using fecal  
555 microbiota as biomarkers for predictions of performance in the selective breeding process of  
556 pedigree broiler breeders. *PLoS One*. 2019;14:e0216080. doi:10.1371/journal.pone.0216080.
- 557 37. Xiao Y, Xiang Y, Zhou W, Chen J, Li K, Yang H. Microbial community mapping in intestinal tract of  
558 broiler chicken. *Poult Sci*. 2017;96:1387–1393. doi:10.3382/ps/pew372.
- 559 38. Takeuchi M, Fang CX, Yokota A. Taxonomic study of the genus *Brachybacterium*: proposal of  
560 *Brachybacterium conglomeratum* sp. nov., nom. rev., *Brachybacterium paraconglomeratum* sp. nov.,  
561 and *Brachybacterium rhamnosum* sp. nov. *Int J Syst Bacteriol*. 1995;45:160–168.  
562 doi:10.1099/00207713-45-1-160.
- 563 39. Hlaing PPT, Junqueira ACM, Uchida A, Purbojati RW, Houghton JN, Chénard C, et al. Complete  
564 genome sequence of *Brachybacterium* sp. Strain SGAir0954, isolated from Singapore air. *Microbiol*  
565 *Resour Announc*. 2019;8. doi:10.1128/MRA.00619-19.
- 566 40. Brummaier T, Hinforthong P, Soe NL, Tongmanakit J, Watthanaworawit W, Ling C.  
567 *Brachybacterium nesterenkovi* isolated from a human blood culture—a first report. *New Microbes*  
568 *New Infect*. 2020;36:100699. doi:10.1016/j.nmni.2020.100699.
- 569 41. Koerner RJ, Goodfellow M, Jones AL. The genus *Dietzia*: a new home for some known and  
570 emerging opportunist pathogens. *FEMS Immunol Med Microbiol*. 2009;55:296–305.  
571 doi:10.1111/j.1574-695X.2008.00513.x.
- 572 42. Rothrock MJ, Locatelli A, Feye KM, Caudill AJ, Guard J, Hiatt K, et al. A microbiomic analysis of a  
573 pasture-raised broiler flock elucidates foodborne pathogen ecology along the farm-to-fork  
574 continuum. *Front Vet Sci*. 2019;6:260. doi:10.3389/fvets.2019.00260.
- 575 43. Oakley BB, Morales CA, Line J, Berrang ME, Meinersmann RJ, Tillman GE, et al. The poultry-  
576 associated microbiome: network analysis and farm-to-fork characterizations. *PLoS One*.  
577 2013;8:e57190. doi:10.1371/journal.pone.0057190.
- 578 44. Salter SJ, Cox MJ, Turek EM, Calus ST, Cookson WO, Moffatt MF, et al. Reagent and laboratory  
579 contamination can critically impact sequence-based microbiome analyses. *BMC Biol*. 2014;12:87.  
580 doi:10.1186/s12915-014-0087-z.
- 581 45. Minich JJ, Sanders JG, Amir A, Humphrey G, Gilbert JA, Knight R. Quantifying and understanding  
582 well-to-well contamination in microbiome research. *mSystems*. 2019;4.  
583 doi:10.1128/mSystems.00186-19.
- 584 46. Vandamme P, Coenye T. Taxonomy of the genus *Cupriavidus*: a tale of lost and found. *Int J Syst*  
585 *Evol Microbiol*. 2004;54 Pt 6:2285–2289. doi:10.1099/ijs.0.63247-0.
- 586 47. Just NA, Létourneau V, Kirychuk SP, Singh B, Duchaine C. Potentially pathogenic bacteria and  
587 antimicrobial resistance in bioaerosols from cage-housed and floor-housed poultry operations. *Ann*  
588 *Occup Hyg*. 2012;56:440–449. doi:10.1093/annhyg/mer105.

- 589 48. Kaur G, Sethi RS. Multiple exposures to poultry barn air and lipopolysaccharide synergistically  
590 increase the pulmonary expression of TLR-4 and IL-1 $\beta$ . *J Occup Health*. 2020;62:e12094.  
591 doi:10.1002/1348-9585.12094.
- 592 49. Zhang J, Li Y, Xu E, Jiang L, Tang J, Li M, et al. Bacterial communities in PM2.5 and PM10 in broiler  
593 houses at different broiler growth stages in spring. *Pol J Vet Sci*. 2019;22:495–504.  
594 doi:10.24425/pjvs.2019.129957.
- 595 50. Josefsen MH, Löfström C, Hansen TB, Christensen LS, Olsen JE, Hoorfar J. Rapid quantification of  
596 viable *Campylobacter* bacteria on chicken carcasses, using real-time PCR and propidium monoazide  
597 treatment, as a tool for quantitative risk assessment. *Appl Environ Microbiol*. 2010;76:5097–5104.  
598 doi:10.1128/AEM.00411-10.
- 599 51. Uyttendaele M, Schukkink R, van Gemen B, Debevere J. Identification of *Campylobacter jejuni*,  
600 *Campylobacter coli* and *Campylobacter lari* by the nucleic acid amplification system NASBAR. *J Appl*  
601 *Bacteriol*. 1994;77:694–701. doi:10.1111/j.1365-2672.1994.tb02821.x.
- 602 52. Docherty L, Adams MR, Patel P, McFadden J. The magnetic immuno-polymerase chain reaction  
603 assay for the detection of *Campylobacter* in milk and poultry. *Lett Appl Microbiol*. 1996;22:288–292.  
604 doi:10.1111/j.1472-765x.1996.tb01163.x.
- 605 53. Lübeck PS, Wolffs P, On SLW, Ahrens P, Rådström P, Hoorfar J. Toward an international standard  
606 for PCR-based detection of food-borne thermotolerant *Campylobacters*: assay development and  
607 analytical validation. *Appl Environ Microbiol*. 2003;69:5664–5669. doi:10.1128/aem.69.9.5664-  
608 5669.2003.
- 609 54. Lagesen K. The Bifrost genomic epidemiology pipeline. Computer software.  
610 DOI:10.5281/zenodo.3984659; Norwegian Veterinary Institute; 2020.
- 611 55. Bushnell B. BMAP: A Fast, Accurate, Splice-Aware Aligner. Computer software.  
612 <https://sourceforge.net/projects/bbmap/>; JGI; 2014.
- 613 56. Bolger AM, Lohse M, Usadel B. Trimmomatic: a flexible trimmer for Illumina sequence data.  
614 *Bioinformatics*. 2014;30:2114–2120. doi:10.1093/bioinformatics/btu170.
- 615 57. Souvorov A, Agarwala R, Lipman DJ. SKESA: strategic k-mer extension for scrupulous assemblies.  
616 *Genome Biol*. 2018;19:153. doi:10.1186/s13059-018-1540-z.
- 617 58. Wood DE, Lu J, Langmead B. Improved metagenomic analysis with Kraken 2. *Genome Biol*.  
618 2019;20:257. doi:10.1186/s13059-019-1891-0.
- 619 59. Walker BJ, Abeel T, Shea T, Priest M, Abouelliel A, Sakthikumar S, et al. Pilon: an integrated tool  
620 for comprehensive microbial variant detection and genome assembly improvement. *PLoS One*.  
621 2014;9:e112963. doi:10.1371/journal.pone.0112963.
- 622 60. Seemann T. Prokka: rapid prokaryotic genome annotation. *Bioinformatics*. 2014;30:2068–2069.  
623 doi:10.1093/bioinformatics/btu153.
- 624 61. Clarke EL, Taylor LJ, Zhao C, Connell A, Lee J-J, Fett B, et al. Sunbeam: an extensible pipeline for  
625 analyzing metagenomic sequencing experiments. *Microbiome*. 2019;7:46. doi:10.1186/s40168-019-  
626 0658-x.
- 627 62. Lu J, Breitwieser FP, Thielen P, Salzberg SL. Bracken: estimating species abundance in  
628 metagenomics data. *PeerJ Computer Science*. 2017;3:e104. doi:10.7717/peerj-cs.104.
- 629  
630
- 631 List of abbreviations

## 632 **Declarations**

### 633 **Ethics declarations**

634 “Not applicable”

635

### 636 **Availability of data and Materials**

637 All sequence data was submitted to the ENA database and is publically available under the umbrella  
638 project PRJEB44024. The individual project numbers are: Genome assemblies - PRJEB43619; Genome  
639 fastq files - PRJEB43621; Metagenome fastq files - PRJEB43623. For sample specific accession  
640 numbers, please see Supplementary materials table S1 and S3.

641

### 642 **Competing interests**

643 The authors declare that they have no competing interests

### 644 **Funding**

645 This work was part of the AIR SAMPLE project carried out in the One Health EJP, which has received  
646 funding from the European Union’s Horizon 2020 research and innovation program under grant  
647 agreement no. 773830 (2018 to 2022).

### 648 **Authors’ contributions**

649 Conception and design: GJ,CS,MT. Drafting of manuscript: TH, CS, GJ, BS. Review and revision of  
650 manuscript: TH, CS, GJ, BS, MT. Sample collection: CS, GJ, MT. Analysis and data interpretation: TH,  
651 CS, GJ, BS. The authors read and approved the final manuscript.

### 652 **Acknowledgements**

653 We thank the Norwegian Sequencing Centre for support, library preparation and sequencing of our  
654 samples. The analysis of the metagenomics data was performed under the project code NN9305K on  
655 1) the Abel Cluster, which is operated by the Department for Research Computing at USIT and owned  
656 by the University of Oslo and Uninett/Sigma2, and 2) the Saga Cluster, owned and maintained by

657 Uninett/Sigma2. (Sigma2.no). The farmer association and farmer that provided access to poultry  
658 houses are acknowledged for their kind collaboration. Tone Fagereng Mathisen, NVI is acknowledged  
659 for assisting with the *Campylobacter* isolates used in the spiking experiments.

660

661 [Electronic supplementary material](#)

662 Supplementary materials.pdf



663

664 **Tables**

665 **Table 1.** Description of samples and *Campylobacter* 16S rDNA real-time PCR results. Samples are  
666 listed by levels of spiking.

| <b>Sample ID</b>   | <b>Sample -<br/><i>C. jejuni</i> spike</b> | <b>Spike<br/>(CFU)</b> | <b>Mock amount<br/>(<math>\mu</math>l)</b> | <b><i>Campylobacter</i>,<br/>Cq</b> |
|--------------------|--------------------------------------------|------------------------|--------------------------------------------|-------------------------------------|
| <b>5-MOCK1-S2a</b> | Mock - CCUG 11284T                         | 20000                  | 75                                         | 29.1                                |
| <b>6-MOCK1-S2b</b> | Mock - CCUG 11284T                         | 20000                  | 75                                         | 29.2                                |
| <b>3-MOCK1-S1a</b> | Mock - CCUG 11284T                         | 200                    | 75                                         | 37.2                                |
| <b>4-MOCK1-S1b</b> | Mock - CCUG 11284T                         | 200                    | 75                                         | 35.2                                |
| <b>1-MOCK1-Ba</b>  | Mock – no spike                            | 0                      | 75                                         | 43.1                                |
| <b>2-MOCK1-Bb</b>  | Mock – no spike                            | 0                      | 75                                         | No Cq                               |
| <b>7-MOCK2-Ba</b>  | Mock – no spike                            | 0                      | 125                                        | 41.1                                |
| <b>8-MOCK2-Bb</b>  | Mock – no spike                            | 0                      | 125                                        | No Cq                               |
| <b>9-H1-3</b>      | House 1 - 927                              | 5650                   | -                                          | 29.4                                |
| <b>10-H1-4</b>     | House 1 - 927                              | 565                    | -                                          | 30.4                                |
| <b>11-H1-5</b>     | House 1 - 927                              | 56,5                   | -                                          | 30.3                                |
| <b>12-H1-B</b>     | House 1 – no spike                         | 0                      | -                                          | 31.1                                |
| <b>13-H2-3</b>     | House 2 - 927                              | 5650                   | -                                          | 30.6                                |
| <b>14-H2-4</b>     | House 2 - 927                              | 565                    | -                                          | 31.3                                |
| <b>15-H2-5</b>     | House 2 - 927                              | 56,5                   | -                                          | 31.3                                |
| <b>16-H2-B</b>     | House 2 – no spike                         | 0                      | -                                          | 32.6                                |

667

668

669 **Table 2.** Overview of the sequencing effort for each of the samples in this study.

| Sample ID    | <i>C. jejuni</i><br>cfu | Raw<br>Paired-<br>end<br>sequences | After quality<br>trimming<br>/filtering (%) | PhiX<br>sequences | Human<br>sequences | Final PE<br>sequences | Metagenome<br>Coverage | Sequence<br>diversity<br>index (Nd) | Average<br>genome size<br>(Mbp) |
|--------------|-------------------------|------------------------------------|---------------------------------------------|-------------------|--------------------|-----------------------|------------------------|-------------------------------------|---------------------------------|
| 1-MOCK1-B-a  |                         | 24675209                           | 93.8                                        | 12                | 16022              | 21444439              | 0.99                   | 16.0                                | 4.10                            |
| 2-MOCK1-B-b  |                         | 18611989                           | 92.6                                        | 11                | 6553               | 16267510              | 0.98                   | 16.1                                | 3.80                            |
| 3-MOCK1-S1-a | 200                     | 21636112                           | 93.2                                        | 16                | 6197               | 18775078              | 0.98                   | 16.1                                | 3.95                            |
| 4-MOCK1-S1-b | 200                     | 25799040                           | 93.7                                        | 18                | 44918              | 22326211              | 0.99                   | 15.9                                | 4.30                            |
| 5-MOCK1-S2-a | 20000                   | 25760599                           | 92.3                                        | 16                | 33337              | 22067796              | 0.98                   | 16.0                                | 4.02                            |
| 6-MOCK1-S2-b | 20000                   | 19029552                           | 93.9                                        | 17                | 16598              | 16649467              | 0.98                   | 16.0                                | 4.08                            |
| 7-MOCK2-B-a  |                         | 16256676                           | 92.7                                        | 25                | 52135              | 14515655              | 0.99                   | 15.3                                | 3.38                            |
| 8-MOCK2-B-b  |                         | 17247065                           | 90.9                                        | 11                | 8124               | 14417819              | 0.99                   | 15.9                                | 4.21                            |
| 9-H1-3       | 5650                    | 16183867                           | 96.4                                        | 10                | 4236               | 14063204              | 0.74                   | 19.4                                | 3.24                            |
| 10-H1-4      | 565                     | 15842872                           | 96.2                                        | 7                 | 3936               | 13728192              | 0.74                   | 19.3                                | 3.20                            |
| 11-H1-5      | 56                      | 26674096                           | 96.2                                        | 15                | 7839               | 23171336              | 0.78                   | 19.4                                | 3.20                            |
| 12-H1-B      |                         | 31645569                           | 97.0                                        | 10                | 9333               | 27869436              | 0.79                   | 19.4                                | 3.24                            |
| 13-H2-3      | 5650                    | 23296681                           | 96.1                                        | 14                | 20021              | 20297450              | 0.79                   | 19.2                                | 3.14                            |
| 14-H2-4      | 565                     | 20578293                           | 95.9                                        | 15                | 4504               | 17927138              | 0.78                   | 19.2                                | 3.12                            |
| 15-H2-5      | 56                      | 13873052                           | 95.9                                        | 6                 | 2728               | 12152054              | 0.75                   | 19.2                                | 3.14                            |
| 16-H2-B      |                         | 15071970                           | 96.2                                        | 11                | 3183               | 13215124              | 0.76                   | 19.2                                | 3.19                            |

670

## 671 Figure legends

672 **Figure 1.** Design of the experiment using different air filters. The MOCK samples were spiked with  
673 200 (S1) or 20.000 (S2) CFU of *C. jejuni* CCUG 11284T. The HOUSE samples were spiked with three  
674 different levels of *C. jejuni* 927.

675

676 **Figure 2.** Relative abundances of bacterial genera found in MOCK and HOUSE samples. The first  
677 column shows the expected abundances of MOCK community taxa as provided by the manufacturer.  
678 Genera with a relative abundance equal or higher than 0.1% in at least one sample were kept for  
679 visualization. Taxa relative abundances below 0.01% are not shown.

680

681 **Figure 3.** *Campylobacter* spp. abundances in MOCK and HOUSE samples using two different methods.

682 **A)** Normalized abundances of *Campylobacter* spp. as found with Kraken read classification. Read  
683 abundances for the different taxa are shown as classified reads per million reads. **B)** Normalized  
684 abundances of reads mapped by BBsplit to the genome sequences of *C. jejuni* CCUG 11284T (MOCK  
685 sample spike) or *C. jejuni* 927 (HOUSE sample spike). Note that in the HOUSE samples we find reads  
686 mapping to *C. jejuni* CCUG 11284T, indicating the presence of strains closely related to this isolate.

687

688

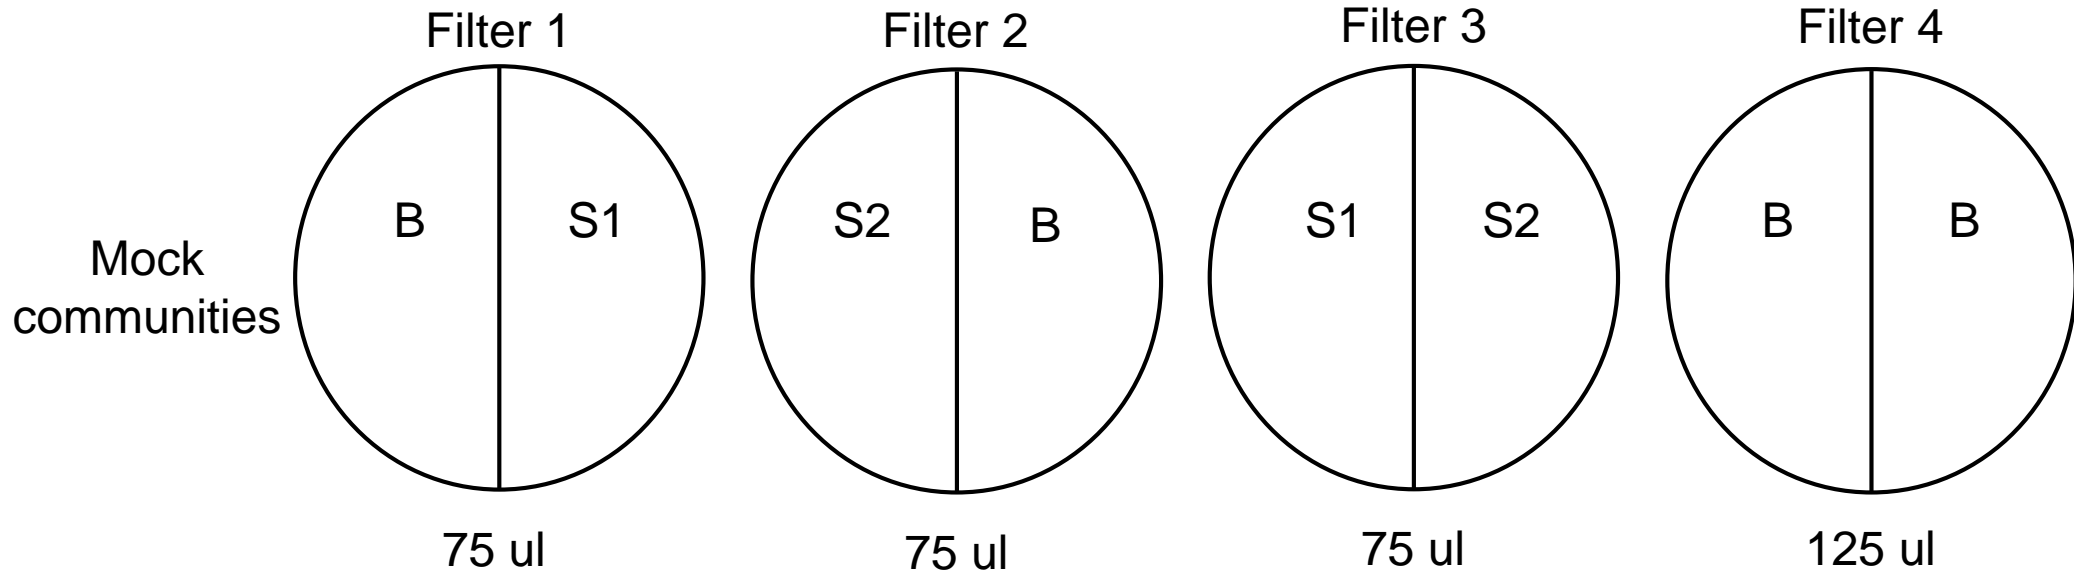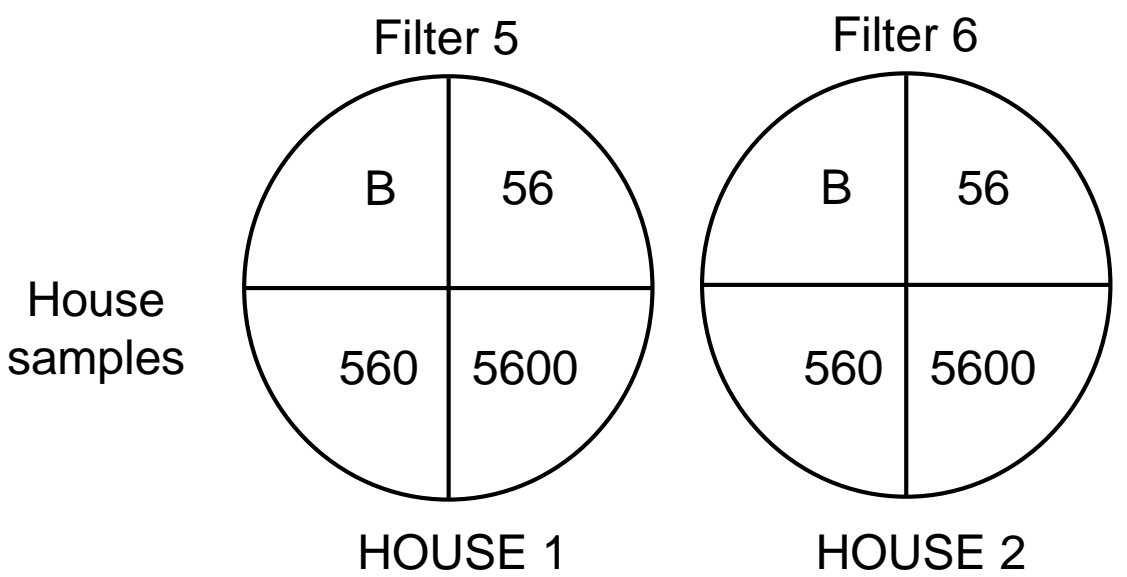

B – Blank  
 S1 – Sample 1 with low spiked *Campylobacter* level  
 S2 – Sample 2 with higher spiked *Campylobacter* level  
 Number – *Campylobacter* CFU amount added to filter.



A

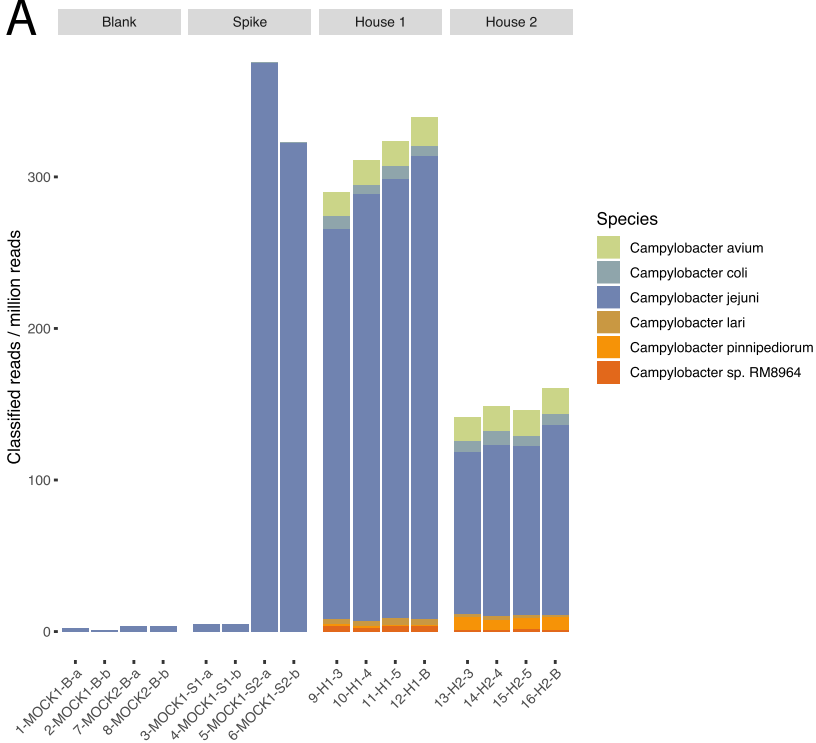

B

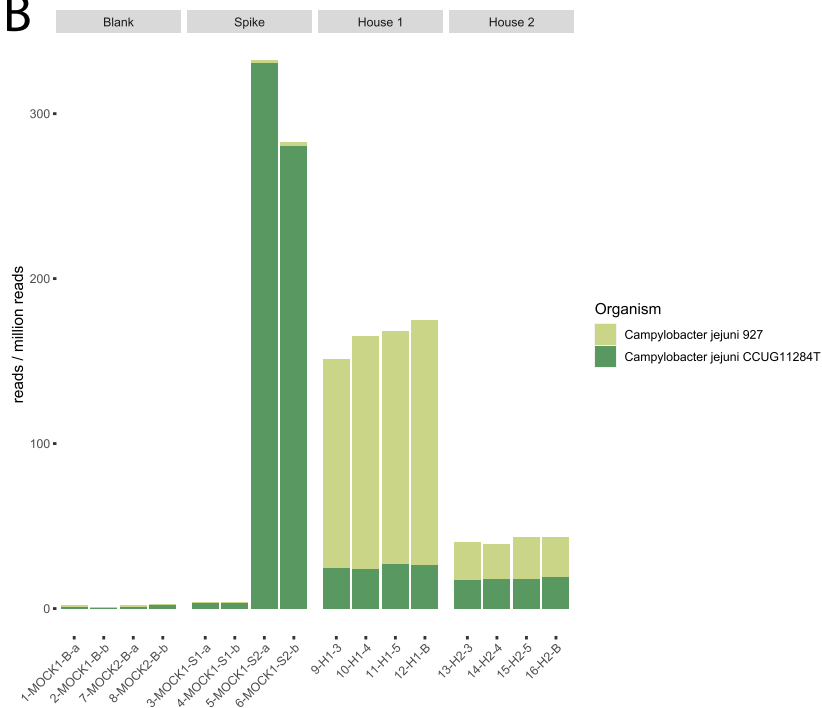

Source: http://biorxiv.org/content/10.1101/2021.05.17.444449v1.full.pdf
